# Supplementary material
Source: MDPI journal article supplement (https://www.mdpi.com/2072-4292/15/2/414)
Supplement: s1 [file s1]

# Supplementary Materials

**There are four tables in Supplementary Materials:**

- (1) Table S1. Spectral indexes
- (2) Table S2. Climate factors
- (3) Table S3. Combined indexes
- (4) Table S4. Comparison between this research and other research methods

**There are four figures in Supplementary Materials:**

- (1) Figure S1. Proportion of total maize yield of each country in the world in 2020.
- (2) Figure S2. Statistics of total grain and maize yield in China from 2005 to 2020.
- (3) Figure S3. Time series curves of the main indicators of maize in China
- (4) Figure S4. Spatial distribution of difference between observed yield and estimated yield

**There are two code links in Supplementary Materials:**

- (1) The code for calculating mean indexes  
<https://code.earthengine.google.com/da20f0cba348d9353c21b24c878587ba?noload=1>
- (2) The code for calculating 8-day time series indexes  
<https://code.earthengine.google.com/20f2b0e027dbe856613f65795dbe26e9>

## Multiple dimensional indexes

### (1) Spectral indexes

**Table S1. Spectral index.**

| Index Type          | Indices                                                                                                                                                                                                                                                                                                                                                                                                                                                                                                                                                                                                                                                                                                                                                                                                                                                                      |
|---------------------|------------------------------------------------------------------------------------------------------------------------------------------------------------------------------------------------------------------------------------------------------------------------------------------------------------------------------------------------------------------------------------------------------------------------------------------------------------------------------------------------------------------------------------------------------------------------------------------------------------------------------------------------------------------------------------------------------------------------------------------------------------------------------------------------------------------------------------------------------------------------------|
| Vegetation          | Enhanced Vegetation Index (EVI2)[1], Normalized Difference Vegetation Index(NDVI) [2], Global Environment Monitoring Index (GEMI)[3], Atmospherically resistant vegetation index2 (ARVI2)[4], Optimized Soil Adjusted Vegetation index (OSAVI) [5], Photosynthetic Vigour Ratio (PVR) [6], Wide dynamic range vegetation index (WDRVI)[7], Normalized Difference NIR/Blue Blue-normalized difference vegetation index (BNDVI) [8], Normalized Difference Phenology Index (NDPI) [9], near-infrared reflectance of vegetation (NIRv)[10], Visible atmospherically resistant index(VARIgreen) [11], Specific leaf area vegetation index (SLAVI) [12], Adjusted transformed soil-adjusted VI(ATSAVI) [13], Leaf Area Index of brown vegetation (LAIbrown) [14], LZC [15], Visible atmospherically resistant indices Green (VIgreen) [16], Green Chromatic Coordinate (GCC) [17] |
| water content       | Normalized Difference Moisture Index (NDMI) [18], Normalized difference infrared index (NDII) [19], Land Surface Water Index (LSWI) [20], SIWSI6 SIWSI7, Modified Normalized Multi-band Drought Index (MNDWI) [21], Normalized Multi-band Drought Index (NMDI)[22], Global Vegetation Moisture Index (GVMI) [23]                                                                                                                                                                                                                                                                                                                                                                                                                                                                                                                                                             |
| Carotenoid content  | Pigment specific simple ratio (PSSRc) [24], Pigment specific normalized difference (PSNDc) [25], Carotenoid reflectance index (CRI <sub>550</sub> )[26], Modified photochemical reflectance index (PRI)[27], Structure Insensitive Pigment Index (SIPI)[28]                                                                                                                                                                                                                                                                                                                                                                                                                                                                                                                                                                                                                  |
| Chlorophyll content | Green Normalized Difference Vegetation Index (GNDVI)[29], Pigment specific simple ratio (PSSRb) [24], Green chlorophyll vegetation Index (GCVI) [30], (NDFI <sub>685</sub> ) [31], Chlorophyll vegetation Index (CVI) [32], Chlorophyll Index (CIgreen) [33], modified anthocyanin content index (mACI) [34]                                                                                                                                                                                                                                                                                                                                                                                                                                                                                                                                                                 |
| Nutrient            | Normalized Difference Nitrogen Index(NDNI) [35], Nitrogen Index (NRI <sub>1510</sub> )[36],                                                                                                                                                                                                                                                                                                                                                                                                                                                                                                                                                                                                                                                                                                                                                                                  |

|         |                                                                                                                        |
|---------|------------------------------------------------------------------------------------------------------------------------|
| content | Narrow-band Normalized Difference Spectral Index (NDSI)[37]                                                            |
| Biomass | Gross Primary Production (GPP) [38], Shortwave Angle Normalized Index(SANI) [39], Dry Matter Content Index (DMCI) [40] |

## (2) Climatic factors

**Table S2. Climatic factors.**

| Data         | Climate factors      | Resenting meaning                                              | Spatial resolution | Time resolution | Units            |
|--------------|----------------------|----------------------------------------------------------------|--------------------|-----------------|------------------|
| ERA5         | Temperature_ max     | Maximum air temperature at 2m                                  | 27830m             | Daily           | K                |
|              | Temperature_ height  | height                                                         | 27830m             | Daily           | K                |
|              | mean                 | Average air temperature at 2m                                  | 27830m             | Daily           | K                |
|              | Temperature_ min     | height                                                         | 27830m             | Daily           | m                |
|              | Total_ precipitation | Minimum air temperature at 2m<br>height<br>Total precipitation |                    |                 |                  |
| TerraClimate | Evapotranspiration   | Actual evapotranspiration                                      | 4638.3m            | Monthly         | mm               |
|              | n                    | Downward surface shortwave                                     | 4638.3m            | Monthly         | W/m <sup>2</sup> |
|              | Radiation            | radiation                                                      | 4638.3m            | Monthly         | mm               |
|              | Soil moisture        | Soil moisture                                                  | 4638.3m            | Monthly         | kPa              |
|              | VPD                  | Vapor pressure deficit                                         |                    |                 |                  |
| MOD09A1      | Temperature_ day     | Day land surface temperature                                   | 1km                | Daily           | Kelvin           |
|              | Temperature_ night   | Night land surface temperature                                 | 1km                | Daily           | Kelvin           |

## (3) Combined indexes

**Table S3. Combined indexes.**

| Indexes | Combination method  | Index A                                                          | Combined index |
|---------|---------------------|------------------------------------------------------------------|----------------|
| NMDI    | (NMDI-A)/(NMDI+A)   | SIPI, CVI, LZC, PSSRc, CRI <sub>550</sub> , NDNI, SANI, GCC, PPR | NMDIA          |
| NMDI    | (NMDI-A)/ NMDI      | SIPI, CVI, LZC                                                   | NMDIA          |
| SIPI    | (SIPI-A)/ (SIPI +A) | NMDI, CVI                                                        | SIPIA          |
| LZC     | (LZC-A)/ (LZC +A)   | NMDI, SIPI, CVI                                                  | LZCA           |
| SANI    | (SANI-A)/ (SANI +A) | NMDI, SIPI, PSSRc, CRI <sub>550</sub> , NRI <sub>1510</sub>      | SANIA          |

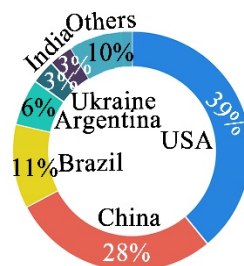

**Figure S1. Proportion of total maize yield of each country in the world in 2020.**

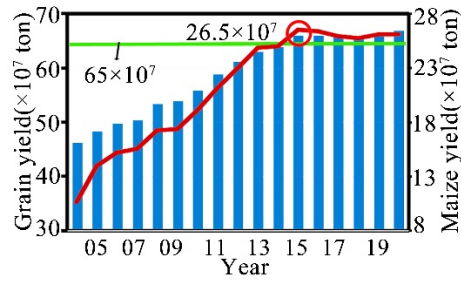

Figure S2. Statistics of total grain and maize yield in China from 2005 to 2020.

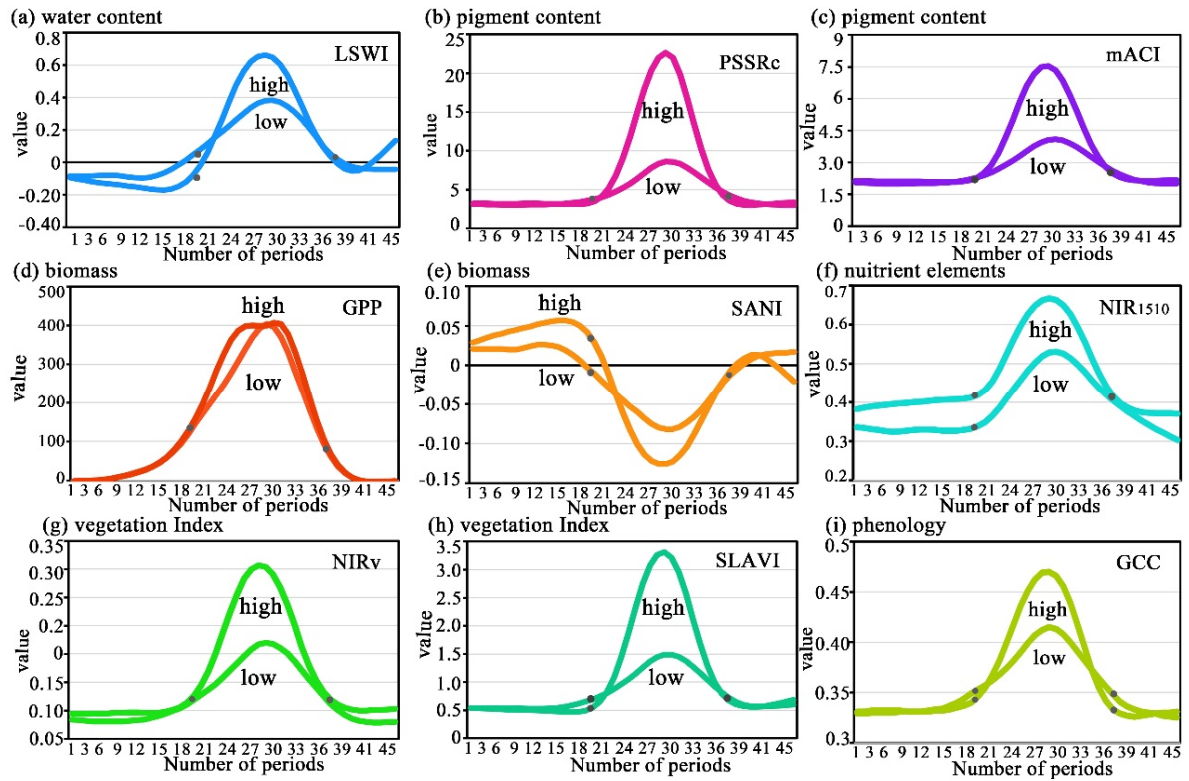

Figure S3. Time series curves of the main indicators of maize in China.

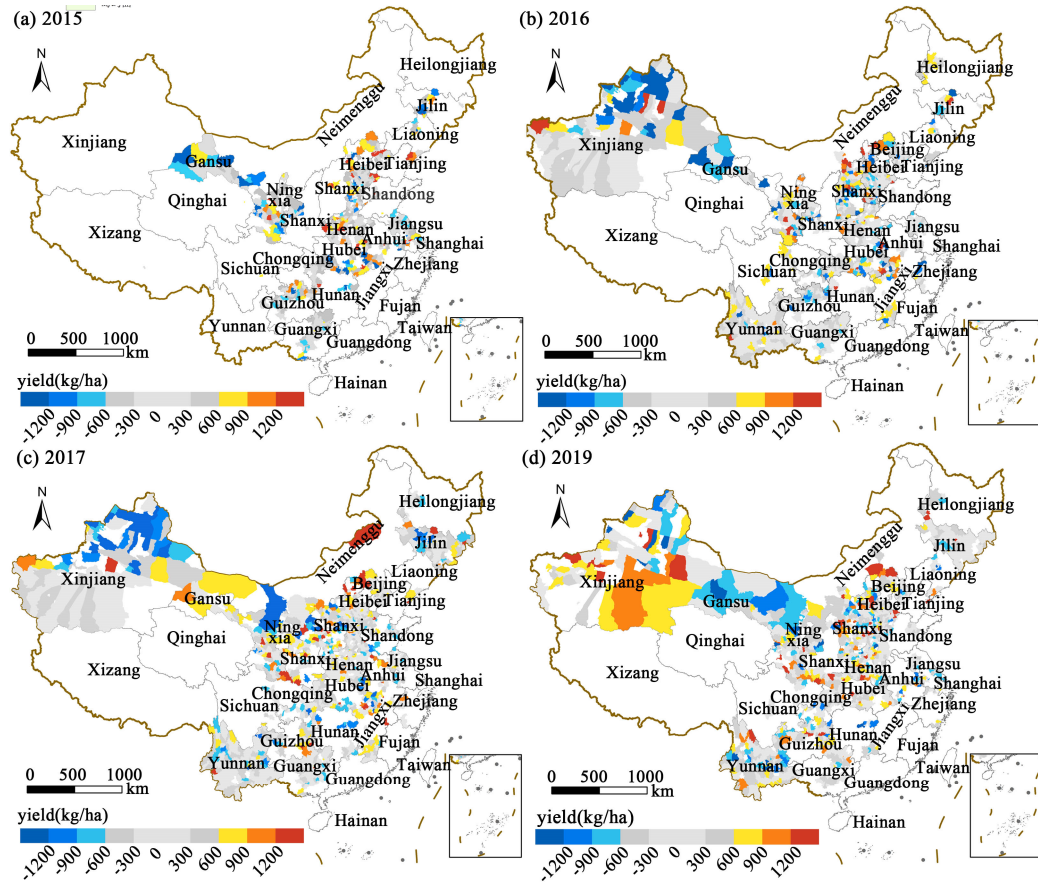

**Figure S4. Spatial distribution of difference between observed yield and estimated yield.**

#### **Comparison of methods of maize yield estimation:**

At present, research on yield estimation mainly focuses on the United States and China, which account for more than 50% of the global corn production. Sun et al. (2020) proposed a novel multilevel deep learning model combining satellite reflectivity, surface temperature, climate and soil data, which combined RNN and CNN to extract spatial and temporal features, and the  $R^2$  reached 0.75 [41]. Based on the Bayesian neural network method, and the satellite, climate, soil and historical yield of maize are used, and the  $R^2$  reached 0.77 [42]. In China, Zhang (2019) combined optical, fluorescence, thermal satellite and environmental data to estimate the yield by using random forest, and the  $R^2$  reached 0.75 [43]. Zhang et al. (2021) combined satellite, climate (temperature and precipitation), field survey yield and heterogeneous geospatial data, and the  $R^2$  reached 0.78 in China at county [44]. The  $R^2$  of yield estimation in China at county level and the United States is mainly between 0.75 and 0.78. In this study, this method mainly combines satellite and climate data, and the maize yield at county level is estimated by integrating different growth periods and indexes reflecting soil, genes and management from side, the  $R^2$  reaches 0.78. Besides, with the increase of indexes, the highest  $R^2$  reaches 0.8. Our method obtains similar results to the existing methods without using soil and geographic space data, which proves the effectiveness of our method. Without using soil and geographic space data, our method has achieved similar results to the existing methods, which prove the effectiveness of our method.

**Table S4. Comparison between this research and other research methods.**

| Region,<br>Study period                                     | Penological<br>period                              | Method                       | Data                                                                                                            | R <sup>2</sup> ;<br>RMSE (kg/ha)                                                                                                                                        | Method comparison                                                                                                                                                                                               |
|-------------------------------------------------------------|----------------------------------------------------|------------------------------|-----------------------------------------------------------------------------------------------------------------|-------------------------------------------------------------------------------------------------------------------------------------------------------------------------|-----------------------------------------------------------------------------------------------------------------------------------------------------------------------------------------------------------------|
| America,<br>county level<br>2010-2019                       | end of<br>season,<br>Growth<br>period              | Deep<br>Bayesian<br>network  | Time series satellite<br>data, continuous<br>climate observation,<br>soil attribute data                        | R <sup>2</sup> : 0.7–0.8<br>(Every year)<br>RMSE:860-1410<br>kg/ha                                                                                                      | Obtain the best yield<br>estimation effect by Deep<br>Bayesian network[42]                                                                                                                                      |
| America.<br>county level<br>2013-2016                       | Growth<br>period                                   | Combining RNN<br>with<br>CNN | MODIS surface<br>reflectance data, LST<br>and weather data, soil<br>property data                               | R <sup>2</sup> : 0.74-0.78<br>(Every year)<br>RMSE:1010.6-<br>11056.5 kg/ha                                                                                             | Combining RNN with<br>CNN, the spatial and<br>temporal features are<br>extracted [41]                                                                                                                           |
| China,<br>county level<br>2010–2012                         | Growth<br>period                                   | LSTM,<br>LightGBM            | VIs, heterogeneous<br>geospatial data, daily<br>surface temperature<br>(LST) and precipitation,<br>temperature. | R <sup>2</sup> =0.78                                                                                                                                                    | With the passage of time, the<br>R <sup>2</sup> obtained by LSTM model<br>continuously improved,<br>while the LightGBM is<br>saturated or even decreased<br>in the late growth period[44]                       |
| China,<br>county level<br>2001-2015                         | Growth<br>period                                   | RF,<br>XGBoost<br>, LSTM     | Optical, fluorescence,<br>thermal satellite, EVI,<br>SIF and<br>environmental factor<br>LST(GDD/KDD/FDD)        | RF: R <sup>2</sup> =0.75,<br>RMSE=744.70<br>kg/ha;<br>XGBoost:<br>R <sup>2</sup> =0.77,<br>RMSE=730.72<br>kg/ha;<br>LSTM: R <sup>2</sup> =0.68,<br>RMSE=820.85kg/<br>ha | Multi-source data are used to<br>realize crop yield estimation,<br>and RF and XGBoost obtain<br>better yield estimation effect<br>than LSTM[43]                                                                 |
| China,<br>county level,<br>2015-2019                        | Vegetative and<br>reproductive<br>growth<br>period | RF                           | integrate of biophysical<br>variables and temporal<br>convergence                                               | R <sup>2</sup> =0.78;<br>RMSE=741.15kg/<br>ha                                                                                                                           | In this study,<br>Compared with LSTM, the RF<br>show higher yield estimation<br>effect. Random forest could<br>deal with imbalance and lost<br>data.                                                            |
| China,<br>county level,<br>2015-2019<br>(excluding<br>2016) | 8-day<br>time<br>series<br>data                    | RF                           | integrate of biophysical<br>variables and temporal<br>convergence                                               | R <sup>2</sup> =0.69;<br>RMSE=715.91kg/<br>ha                                                                                                                           | The maize yield at county<br>level is estimated by<br>integrating different growth<br>periods and indexes reflecting<br>soil, genes and management<br>from side, and the results are<br>close to other studies. |
| China,<br>county level,<br>2015-2019<br>(excluding<br>2016) | 8-day<br>time<br>series<br>data                    | CNN-<br>LSTM                 | integrate of biophysical<br>variables and temporal<br>convergence                                               | R <sup>2</sup> =0.62;<br>RMSE=897.88kg/<br>ha                                                                                                                           |                                                                                                                                                                                                                 |

## The link to code

### (1) The Code for calculating mean indicators

<https://code.earthengine.google.com/da20f0cba348d9353c21b24c878587ba?noload=1>

### (2) The Code for calculating time series indicators

<https://code.earthengine.google.com/20f2b0e027dbe856613f65795dbe26e9>

## Reference

1. Jiang Z, Huete AR, Didan K, Miura T: Development of a two-band enhanced vegetation index without a blue band. *Remote Sens Environ* 2008, 112(10):3833-3845.
2. Rouse JW, Haas RH, Schell JA, Deering DW, Harlan JC: Monitoring the vernal advancement and retrogradation (greenwave effect) of natural vegetation. *Nasa/gsfct Type Final Report* 1974.
3. Verstraete BPM: GEMI: a non-linear index to monitor global vegetation from satellites. *Vegetatio* 1992, 101(1):15-20.
4. Kaufman YJ, Tanre D: Atmospherically resistant vegetation index (ARVI) for EOS-MODIS. *IEEE Trans Geosci Remote Sens* 1992, 30(2):261-270.
5. Rondeaux G, Steven M, Baret F: Optimization of soil-adjusted vegetation indices. *Remote Sensing of Environment* 1996, 55(2):95-107.
6. Metternicht G: Vegetation indices derived from high-resolution airborne videography for precision crop management. *Int J Remote Sens* 2003, 24(14):2855-2877.
7. Gitelson AA: Wide Dynamic Range Vegetation Index for Remote Quantification of Biophysical Characteristics of Vegetation. *Journal of Plant Physiology* 2004, 161(2):165-173.
8. Hancock DW, Dougherty CT: Relationships between Blue- and Red-based Vegetation Indices and Leaf Area and Yield of Alfalfa. *Crop Science* 2007, 47(6):2547-2556.
9. Wang C, Chen J, Wu J, Tang Y, Shi P, Black TA, Zhu K: A snow-free vegetation index for improved monitoring of vegetation spring green-up date in deciduous ecosystems. *Remote Sens Environ* 2017, 196:1-12.
10. Lambert M-J, Traoré PCS, Blaes X, Baret P, Defourny P: Estimating smallholder crops production at village level from Sentinel-2 time series in Mali's cotton belt. *Remote Sens Environ* 2018, 216:647-657.
11. Eng LS, Ismail R, Hashim W, Baharum A: The Use of VARI, GLI, and Vlgreen Formulas in Detecting Vegetation In aerial Images. *International Journal of Technology* 2019, 10:1385-1394.
12. Lymburner L, Beggs PJ, Jacobson CR: Estimation of canopy-average surface-specific leaf area using Landsat TM data. *Photogramm Eng Rem S* 2000, 66(2):183-192.
13. He Y, Guo X, Wilmshurst JF: Comparison of different methods for measuring leaf area index in a mixed grassland. *Can J Plant Sci* 2007, 87(4):803-813.
14. Delegido J, Verrelst J, Rivera JP, Ruiz-Verdú A, Moreno J: Brown and green LAI mapping through spectral indices. *Int J Appl Earth Obs* 2015, 35:350-358.
15. Gao Y, Guo T, Hao L, Hu Y: Preliminary study on estimation of wax content in wheat leaf epidermis by reflectance spectroscopy. *Journal of wheat crops* 2014, 34(4):509-515.
16. Zhao C, Liu L, Wang J, Huang W, Song X, Li C: Predicting grain protein content of winter wheat using remote sensing data based on nitrogen status and water stress. *Int J Appl Earth Obs* 2005, 7:1-9.
17. Thapa S, Garcia Millan VE, Eklundh L: Assessing Forest Phenology: A Multi-Scale Comparison of Near-Surface (UAV, Spectral Reflectance Sensor, PhenoCam) and Satellite (MODIS, Sentinel-2) Remote Sensing. *Remote Sensing* 2021, 13(8):1597.
18. Hardisky, M. S, Klemas V, Smart, M. R: The influence of soil salinity, growth form, and leaf moisture on the spectral radiance of *Spartina Alterniflora* canopies. *Photogrammetric Eng & Remote Sens* 1983, 49(1):77-84.
19. Hardisky M, Klemas V, Smart M: The influence of soil salinity, growth form, and leaf moisture on the spectral radiance of. *Spartina alterniflora* 1983, 49:77-83.

20. Xiao X, Boles S, Frolking S, Salas W, Moore B, Li C, He L, Zhao R: Landscape-scale characterization of cropland in China using Vegetation and Landsat TM images. *Int J Remote Sens* 2002, 23(18):3579-3594.
21. Xu H: Research on extracting water information using improved normalized difference water index (MNDWI). *Journal of remote sensing* 2005, 9(5):7.
22. Wang L, Qu JJ: NMDI: A normalized multi-band drought index for monitoring soil and vegetation moisture with satellite remote sensing. *Geophysical Research Letters*, 34: L20405. *Geophysical Research Letters* 2007, 34(20):117-131.
23. Glenn EP, Nagler PL, Huete AR: Vegetation index methods for estimating evapotranspiration by remote sensing. *Surv Geophys* 2010, 31(6):531-555.
24. Fensholt R, Sandholt I: Derivation of a shortwave infrared water stress index from MODIS near- and shortwave infrared data in a semiarid environment. *Remote Sens Environ* 2003, 87(1):111-121.
25. Blackburn GA: Spectral indices for estimating photosynthetic pigment concentrations: a test using senescent tree leaves. *Int J Remote Sens* 1998, 19(4):657-675.
26. Gitelson AA, Zur Y, Chivkunova OB, Merzlyak MN: Assessing Carotenoid Content in Plant Leaves with Reflectance Spectroscopy. *Photochemistry and photobiology* 2002, 75(3):272-281.
27. Gamon J, Penuelas J, Field C: A narrow-waveband spectral index that tracks diurnal changes in photosynthetic efficiency. *Remote Sens Environ* 1992, 41(1):35-44.
28. Penuelas J, Baret F, Filella I: Semi-empirical indices to assess carotenoids/chlorophyll a ratio from leaf spectral reflectance. *Photosynthetica* 1995, 31(2):221-230.
29. Gitelson AA, Merzlyak MN: Signature analysis of leaf reflectance spectra: algorithm development for remote sensing of chlorophyll. *J Plant Physiol* 1996, 148(3-4):494-500.
30. Gitelson AA, Viña A, Arkebauer TJ, Rundquist DC, Keydan G, Leavitt B: Remote estimation of leaf area index and green leaf biomass in maize canopies. *Geophysical research letters* 2003, 30(5).
31. Dobrowski S, Pushnik J, Zarco-Tejada PJ, Ustin S: Simple reflectance indices track heat and water stress-induced changes in steady-state chlorophyll fluorescence at the canopy scale. *Remote Sens Environ* 2005, 97(3):403-414.
32. Vincini M, Frazzi E, D'alessio P: Comparison of narrow-band and broad-band vegetation indices for canopy chlorophyll density estimation in sugar beet. In: *Precision agriculture'07 Papers presented at the 6th European Conference on Precision Agriculture, Skiathos, Greece, 3-6 June, 2007: 2007*. Wageningen Academic Publishers: 189-196.
33. Gitelson AA, Gritz Y, Merzlyak MN: Relationships between leaf chlorophyll content and spectral reflectance and algorithms for non-destructive chlorophyll assessment in higher plant leaves. *Journal of plant physiology* 2003, 160(3):271-282.
34. Anatoly, A., Gitelson, Yoav, Zur, Olga, B., Chivkunova, Mark, N.: Assessing Carotenoid Content in Plant Leaves with Reflectance Spectroscopy. *Photochemistry & Photobiology* 2002, 75(3):272-281.
35. Serrano L, Peñuelas J, Ustin SL: Remote sensing of nitrogen and lignin in Mediterranean vegetation from AVIRIS data. *Remote Sensing of Environment* 2002, 81(2).
36. Herrmann I, Karnieli A, Bonfil DJ, Cohen Y, Alchanatis V: SWIR-based spectral indices for assessing nitrogen content in potato fields. *International Journal of Remote Sensing* 2010, 31(19):5127-5143.
37. Inoue Y, Sakaiya E, Zhu Y, Takahashi W: Diagnostic mapping of canopy nitrogen content in rice based on hyperspectral measurements. *Remote Sensing of Environment* 2012, 126:210-221.
38. Michael M, Kevin T, Jesslyn B: Optimizing a remote sensing production efficiency model for macro-scale GPP and yield estimation in agroecosystems. *Remote Sens Environ* 2018, 217:258-271.

39. Palacios-Orueta A, Khanna S, Litago J, Whiting ML, Ustin SL: Assessment of NDVI and NDWI spectral indices using MODIS time series analysis and development of a new spectral index based on MODIS shortwave infrared bands. In: *1st International Conference on Remote sensing and geoinformation processing in the assessment and monitoring of land degradation and desertification*, Trier, Germany, 2005: 2005.
40. Romero A, Aguado I, Yebra M: Estimation of dry matter content in leaves using normalized indexes and PROSPECT model inversion. *International Journal of Remote Sensing* 2012, 33(1-2):396-414.
41. Sun J, Lai Z, Di L, Sun Z, Shen Y: Multi-level deep learning network for county-level corn yield estimation in the U.S. Corn Belt. *IEEE Journal of Selected Topics in Applied Earth Observations and Remote Sensing* 2020, PP(99):5048-5060.
42. Ma Y, Zhang Z, Kang Y, Özdoğan M: Corn yield prediction and uncertainty analysis based on remotely sensed variables using a Bayesian neural network approach. *Remote Sensing of Environment* 2021, 259:112408.
43. Zhang L, Zhang Z, Luo Y, Cao J, Tao F: Combining Optical, Fluorescence, Thermal Satellite, and Environmental Data to Predict County-Level Maize Yield in China Using Machine Learning Approaches. *Remote Sensing* 2020, 12(1):21.
44. Zhang L, Zhang Z, Luo Y, Cao J, Xie R, Li S: Integrating satellite-derived climatic and vegetation indices to predict smallholder maize yield using deep learning. *Agricultural and Forest Meteorology* 2021, 311:108666.
